# Supplementary material
Source: publisher figshare collection journal article supplement (https://sage.figshare.com/ndownloader/files/23507477)
Supplement: Supplementary file 1 [file 23507477]

## Supplementary Table 1 Medline and CENTRAL database search strategy

### Medline and CENTRAL:

1. Withholding Treatment/
2. exp Respiration, Artificial/
3. Ventilator Weaning/
4. Airway Extubation/
5. (((Ventilat\* or respirat\*) adj2 wean\*) or (Terminal adj2 (wean\* or extubat\*)) or (((Withdraw\* or extubat\* or remov\* or withhold\* or cessation) adj3 ((Mechanic\* or artificial\* or assist\*) adj2 (ventilat\* or respirat\* or breath\*))) or (Life adj2 sustaining adj2 treatment\*))) .ti,ab,kw.
6. (1 and 2) or 3 or 4
7. 6 or 5
8. Intensive care units/ or Respiratory care units/ or "Life Support Care"/
9. Critical Care/
10. (((intensive or critical or respiratory) adj2 (unit or units or care or ward)) or icu or itu).ti,ab,kw.
11. 8 or 9 or 10
12. Palliative Care/
13. (end\* adj3 life).ti,ab,kw.
14. (last year of life or LYOL).ti,ab,kw.
15. palliat\*.ti,ab,kw.
16. Terminally Ill/
17. hospice\*.ti,ab,kw.
18. (terminal\* adj3 (car\* or ill\* or diseas\*)).ti,ab,kw.
19. (terminal-stage\* or terminal stage\* or dying or (close adj4 death)).ti,ab,kw.
20. exp Terminal Care/
21. Hospice Care/
22. (dying adj3 care).ti,ab,kw.
23. ((end-stage\* or end stage\* or incurable or advanced) adj5 (disease\* or ill\* or care or cancer\* or malignan\*)).ti,ab,kw.
24. or/12-23
25. adolescent/ or exp child/ or exp infant/

26. (infant\* or neonat\* or newborn\* or baby or child\* or paediatric or pediatric or girl or girls or boy or boys or kid or kids or teen\* or young\* or youth or youths or preadolescen\* or adolescen\* or preschooler or school age\* or schoolchild\*).ti,ab,kw.

27. 25 or 26

28. 7 and 11 and 24

29. 28 not 27

30. limit 29 to (yr="2007 -Current" and (english or french or greek))

**Supplementary Table 2 Studies' appraisals**

| Qualitative studies: CASP                             |                                                                                                                                         |                                                                     |                                                                                                                                             |                                                                                                                                                                                                                              |                                                                                                                                                       |                                                                                                                                                      |                                                                                                                                       |                                                                                              |                                                                                                                                                           |                                                                                                                                        |                                                                                                            |                                                |                                                                               |                                                                     |                                                  |                                                                                                                         |                                                                             |                                                  |                                                                                                                         |                                                               |                                   |
|-------------------------------------------------------|-----------------------------------------------------------------------------------------------------------------------------------------|---------------------------------------------------------------------|---------------------------------------------------------------------------------------------------------------------------------------------|------------------------------------------------------------------------------------------------------------------------------------------------------------------------------------------------------------------------------|-------------------------------------------------------------------------------------------------------------------------------------------------------|------------------------------------------------------------------------------------------------------------------------------------------------------|---------------------------------------------------------------------------------------------------------------------------------------|----------------------------------------------------------------------------------------------|-----------------------------------------------------------------------------------------------------------------------------------------------------------|----------------------------------------------------------------------------------------------------------------------------------------|------------------------------------------------------------------------------------------------------------|------------------------------------------------|-------------------------------------------------------------------------------|---------------------------------------------------------------------|--------------------------------------------------|-------------------------------------------------------------------------------------------------------------------------|-----------------------------------------------------------------------------|--------------------------------------------------|-------------------------------------------------------------------------------------------------------------------------|---------------------------------------------------------------|-----------------------------------|
|                                                       | 1. Was there a clear statement of the aims of the research?                                                                             | 2. Is a qualitative methodology appropriate?                        | 3. Was the research design appropriate to address the aims of the research?                                                                 | 4. Was the recruitment strategy appropriate to the aims of the research?                                                                                                                                                     | 5. Was the data collected in a way that addressed the research issue?                                                                                 | 6. Has the relationship between researcher and participants been adequately considered?                                                              | 7. Have ethical issues been taken into consideration?                                                                                 | 8. Was the data analysis sufficiently rigorous?                                              | 9. Is there a clear statement of findings?                                                                                                                | 10. How valuable is the research?                                                                                                      |                                                                                                            |                                                |                                                                               |                                                                     |                                                  |                                                                                                                         |                                                                             |                                                  |                                                                                                                         |                                                               |                                   |
| Aita & Kai (2010)                                     | Yes                                                                                                                                     | Yes                                                                 | Yes                                                                                                                                         | Yes                                                                                                                                                                                                                          | Yes                                                                                                                                                   | Yes                                                                                                                                                  | Yes                                                                                                                                   | Yes                                                                                          | Yes                                                                                                                                                       | Yes                                                                                                                                    | Out of 10                                                                                                  |                                                |                                                                               |                                                                     |                                                  |                                                                                                                         |                                                                             |                                                  |                                                                                                                         |                                                               |                                   |
| Hadders (2009)                                        | Yes                                                                                                                                     | Yes                                                                 | No                                                                                                                                          | Yes                                                                                                                                                                                                                          | Yes                                                                                                                                                   | Yes                                                                                                                                                  | Yes                                                                                                                                   | No                                                                                           | Yes                                                                                                                                                       | Can't tell                                                                                                                             | 10 Yes                                                                                                     |                                                |                                                                               |                                                                     |                                                  |                                                                                                                         |                                                                             |                                                  |                                                                                                                         |                                                               |                                   |
| Wiegand & Petri (2010)                                | Can't tell                                                                                                                              | Can't tell                                                          | Can't tell                                                                                                                                  | Yes                                                                                                                                                                                                                          | Yes                                                                                                                                                   | Can't tell                                                                                                                                           | Can't tell                                                                                                                            | Yes                                                                                          | Yes                                                                                                                                                       | Can't tell                                                                                                                             | 7 Yes, 2 No, 1 Can't tell                                                                                  |                                                |                                                                               |                                                                     |                                                  |                                                                                                                         |                                                                             |                                                  |                                                                                                                         |                                                               |                                   |
| Wiegand (2015)                                        | Yes                                                                                                                                     | Yes                                                                 | Yes                                                                                                                                         | Yes                                                                                                                                                                                                                          | Yes                                                                                                                                                   | Can't tell                                                                                                                                           | Yes                                                                                                                                   | Yes                                                                                          | Yes                                                                                                                                                       | Yes                                                                                                                                    | 4 Yes, 6 Can't tell                                                                                        |                                                |                                                                               |                                                                     |                                                  |                                                                                                                         |                                                                             |                                                  |                                                                                                                         |                                                               |                                   |
| Wiegand et al. (2019)                                 | Yes                                                                                                                                     | Yes                                                                 | Yes                                                                                                                                         | Yes                                                                                                                                                                                                                          | Yes                                                                                                                                                   | Can't tell                                                                                                                                           | Yes                                                                                                                                   | Yes                                                                                          | Yes                                                                                                                                                       | Yes                                                                                                                                    | 9 Yes, 1 Can't tell                                                                                        |                                                |                                                                               |                                                                     |                                                  |                                                                                                                         |                                                                             |                                                  |                                                                                                                         |                                                               |                                   |
| Surveys AXIS                                          |                                                                                                                                         |                                                                     |                                                                                                                                             |                                                                                                                                                                                                                              |                                                                                                                                                       |                                                                                                                                                      |                                                                                                                                       |                                                                                              |                                                                                                                                                           |                                                                                                                                        |                                                                                                            |                                                |                                                                               |                                                                     |                                                  |                                                                                                                         |                                                                             |                                                  |                                                                                                                         |                                                               |                                   |
|                                                       | 1. Were the aims/objectives of the study clear?                                                                                         | 2. Was the study design appropriate for the stated aim(s)?          | 3. Was the sample size justified?                                                                                                           | 4. Was the target/reference population clearly defined? (Is it clear who the research was about?)                                                                                                                            | 5. Was the sample frame taken from an appropriate population base so that it closely represented the target/reference population under investigation? | 6. Was the selection process likely to select subjects/participants that were representative of the target/reference population under investigation? | 7. Were measures undertaken to address and categorise non-responders?                                                                 | 8. Were the risk factor and outcome variables measured appropriate to the aims of the study? | 9. Were the risk factor and outcome variables measured correctly using instruments/m-essurements that had been trialled, piloted or published previously? | 10. Is it clear what was used to determined statistical significance and/or precision estimates? (e.g. p-values, confidence intervals) | 11. Were the methods (including statistical methods) sufficiently described to enable them to be repeated? | 12. Were the basic data adequately described?  | 13. Does the response rate raise concerns about non-response bias?            | 14. If appropriate, was information about non-responders described? | 15. Were the results internally consistent?      | 16. Were the results presented for all the analyses described in the methods?                                           | 17. Were the authors' discussions and conclusions justified by the results? | 18. Were the limitations of the study discussed? | 19. Were there any funding sources or conflicts of interest that may affect the authors' interpretation of the results? | 20. Was ethical approval or consent of participants attained? |                                   |
| Cottereau et al. (2016)                               | Yes                                                                                                                                     | Yes                                                                 | No                                                                                                                                          | Yes                                                                                                                                                                                                                          | Yes                                                                                                                                                   | Yes                                                                                                                                                  | Don't know                                                                                                                            | Yes                                                                                          | Yes                                                                                                                                                       | No                                                                                                                                     | Yes                                                                                                        | Yes                                            | Don't know                                                                    | No                                                                  | Yes                                              | Yes                                                                                                                     | Yes                                                                         | Yes                                              | No                                                                                                                      | Yes                                                           | Out of 20                         |
| Dean et al. (2010)                                    | Yes                                                                                                                                     | Yes                                                                 | No                                                                                                                                          | Yes                                                                                                                                                                                                                          | Yes                                                                                                                                                   | Yes                                                                                                                                                  | Don't know                                                                                                                            | Yes                                                                                          | Don't know                                                                                                                                                | No                                                                                                                                     | No                                                                                                         | Yes                                            | Don't know                                                                    | No                                                                  | Yes                                              | Don't know                                                                                                              | Yes                                                                         | No                                               | Don't know                                                                                                              | Don't know                                                    | 14 Yes, 4 No, 2 Don't know        |
| Grandhige et al. (2016)                               | Yes                                                                                                                                     | Yes                                                                 | No                                                                                                                                          | Yes                                                                                                                                                                                                                          | Don't know                                                                                                                                            | Don't know                                                                                                                                           | Don't know                                                                                                                            | Yes                                                                                          | Yes                                                                                                                                                       | No                                                                                                                                     | Yes                                                                                                        | Yes                                            | Don't know                                                                    | No                                                                  | Yes                                              | Yes                                                                                                                     | No                                                                          | Yes                                              | Don't know                                                                                                              | Don't know                                                    | 9 Yes, 5 No, 6 Don't know         |
| Groselj et al. (2014)                                 | Yes                                                                                                                                     | Yes                                                                 | No                                                                                                                                          | Yes                                                                                                                                                                                                                          | Yes                                                                                                                                                   | Yes                                                                                                                                                  | Don't know                                                                                                                            | Yes                                                                                          | Don't know                                                                                                                                                | Yes                                                                                                                                    | Yes                                                                                                        | Yes                                            | Don't know                                                                    | No                                                                  | Yes                                              | Yes                                                                                                                     | Yes                                                                         | Yes                                              | No                                                                                                                      | Yes                                                           | 11 Yes, 4 No, 5 Don't know        |
| Observational studies (team developed appraisal tool) |                                                                                                                                         |                                                                     |                                                                                                                                             |                                                                                                                                                                                                                              |                                                                                                                                                       |                                                                                                                                                      |                                                                                                                                       |                                                                                              |                                                                                                                                                           |                                                                                                                                        |                                                                                                            |                                                |                                                                               |                                                                     |                                                  |                                                                                                                         |                                                                             |                                                  |                                                                                                                         |                                                               |                                   |
|                                                       | 1. Was the research question or objective in this paper clearly stated?                                                                 | 2. Was the study population clearly specified and defined?          | 3. Was the participation rate of eligible persons at least 50%?                                                                             | 4. Were all the subjects selected or recruited from the same or similar populations (same time period)? Were inclusion and exclusion criteria for being in the study prespecified and applied uniformly to all participants? | 5. Was a sample size justification, power, precision, or variance and effect estimates provided?                                                      | 6. Was the analysis of data appropriate?                                                                                                             | 7. Is it clear what was used to determined statistical significance and/or precision estimates? (e.g. p-values, confidence intervals) | 8. Are outcomes and variables described well?                                                | 9. Were the data collectors trained and blinded (if applicable)?                                                                                          | 10. Were the basic data adequately described?                                                                                          | 11. Does the response rate raise concerns about non-response bias? If applicable                           | 12. Is missing data reported? Is it addressed? | 13. Were the results presented for all the analyses described in the methods? | 14. Were the findings discussed in relation to existing literature? | 15. Were the limitations of the study discussed? | 16. Were there any funding sources or conflicts of interest that may affect the authors' interpretation of the results? | 17. Was ethical approval or consent of participants attained?               |                                                  |                                                                                                                         |                                                               |                                   |
| Bloomer et al. (2010)                                 | No                                                                                                                                      | Yes                                                                 | N/A                                                                                                                                         | Yes                                                                                                                                                                                                                          | No                                                                                                                                                    | Can't tell                                                                                                                                           | Can't tell                                                                                                                            | Yes                                                                                          | Can't tell                                                                                                                                                | Yes                                                                                                                                    | N/A                                                                                                        | Yes                                            | Yes                                                                           | Yes                                                                 | Yes                                              | Can't tell                                                                                                              | No                                                                          |                                                  |                                                                                                                         |                                                               | Out of 17                         |
| Cooke et al. (2010)                                   | Yes                                                                                                                                     | Yes                                                                 | N/A                                                                                                                                         | Yes                                                                                                                                                                                                                          | No                                                                                                                                                    | Yes                                                                                                                                                  | Yes                                                                                                                                   | Yes                                                                                          | Yes                                                                                                                                                       | N/A                                                                                                                                    | Yes                                                                                                        | Yes                                            | Yes                                                                           | Yes                                                                 | Yes                                              | No                                                                                                                      | Can't tell                                                                  |                                                  |                                                                                                                         |                                                               | 8 Yes, 3 No, 3 Can't tell, 2 N/A  |
| Epker et al. (2011)                                   | Yes                                                                                                                                     | Yes                                                                 | N/A                                                                                                                                         | Yes                                                                                                                                                                                                                          | No                                                                                                                                                    | Yes                                                                                                                                                  | No                                                                                                                                    | Yes                                                                                          | Can't tell                                                                                                                                                | Yes                                                                                                                                    | N/A                                                                                                        | No                                             | Yes                                                                           | Yes                                                                 | Yes                                              | No                                                                                                                      | No                                                                          |                                                  |                                                                                                                         |                                                               | 13 Yes, 1 No, 1 Can't tell, 2 N/A |
| Epker et al. (2015)                                   | Yes                                                                                                                                     | Yes                                                                 | N/A                                                                                                                                         | Yes                                                                                                                                                                                                                          | No                                                                                                                                                    | Yes                                                                                                                                                  | No                                                                                                                                    | Yes                                                                                          | Can't tell                                                                                                                                                | Yes                                                                                                                                    | N/A                                                                                                        | No                                             | Yes                                                                           | Yes                                                                 | Yes                                              | No                                                                                                                      | No                                                                          |                                                  |                                                                                                                         |                                                               | 10 Yes, 4 No, 1 Can't tell, 2 N/A |
| Gerstel et al. (2008)                                 | Yes                                                                                                                                     | Yes                                                                 | No                                                                                                                                          | Yes                                                                                                                                                                                                                          | No                                                                                                                                                    | Yes                                                                                                                                                  | Yes                                                                                                                                   | Yes                                                                                          | Yes                                                                                                                                                       | Yes                                                                                                                                    | Can't tell                                                                                                 | Yes                                            | Yes                                                                           | Yes                                                                 | Yes                                              | No                                                                                                                      | Yes                                                                         |                                                  |                                                                                                                         |                                                               | 10 Yes, 2 No, 1 Can't tell, 2 N/A |
| Huynh et al. (2013)                                   | Yes                                                                                                                                     | Yes                                                                 | N/A                                                                                                                                         | Yes                                                                                                                                                                                                                          | Yes                                                                                                                                                   | Yes                                                                                                                                                  | Yes                                                                                                                                   | Yes                                                                                          | Yes                                                                                                                                                       | Yes                                                                                                                                    | N/A                                                                                                        | No                                             | Yes                                                                           | Yes                                                                 | Yes                                              | No                                                                                                                      | No                                                                          |                                                  |                                                                                                                         |                                                               | 14 Yes, 2 No, 2 N/A               |
| Kross et al. (2011)                                   | Yes                                                                                                                                     | Yes                                                                 | Yes                                                                                                                                         | Yes                                                                                                                                                                                                                          | No                                                                                                                                                    | Yes                                                                                                                                                  | Yes                                                                                                                                   | Yes                                                                                          | Yes                                                                                                                                                       | Yes                                                                                                                                    | Yes                                                                                                        | Yes                                            | Yes                                                                           | Yes                                                                 | Yes                                              | No                                                                                                                      | Yes                                                                         |                                                  |                                                                                                                         |                                                               | 16 Yes, 1 No, 0 N/A               |
| Long et al. (2015)                                    | Yes                                                                                                                                     | Yes                                                                 | N/A                                                                                                                                         | Yes                                                                                                                                                                                                                          | No                                                                                                                                                    | Yes                                                                                                                                                  | Yes                                                                                                                                   | Yes                                                                                          | Yes                                                                                                                                                       | Yes                                                                                                                                    | N/A                                                                                                        | Yes                                            | Yes                                                                           | Yes                                                                 | Yes                                              | No                                                                                                                      | Yes                                                                         |                                                  |                                                                                                                         |                                                               | 14 Yes, 1 No, 2 N/A               |
| Mazer et al. (2011)                                   | Yes                                                                                                                                     | Yes                                                                 | N/A                                                                                                                                         | Yes                                                                                                                                                                                                                          | No                                                                                                                                                    | Yes                                                                                                                                                  | Yes                                                                                                                                   | Yes                                                                                          | Can't tell                                                                                                                                                | Yes                                                                                                                                    | N/A                                                                                                        | No                                             | Yes                                                                           | Yes                                                                 | Yes                                              | No                                                                                                                      | Yes                                                                         |                                                  |                                                                                                                         |                                                               | 12 Yes, 2 No, 1 Can't tell, 2 N/A |
| Robert et al. (2017)                                  | Yes                                                                                                                                     | Yes                                                                 | Yes                                                                                                                                         | Yes                                                                                                                                                                                                                          | Yes                                                                                                                                                   | Yes                                                                                                                                                  | Yes                                                                                                                                   | Yes                                                                                          | Yes                                                                                                                                                       | Yes                                                                                                                                    | No                                                                                                         | Yes                                            | Yes                                                                           | Yes                                                                 | Yes                                              | No                                                                                                                      | Yes                                                                         |                                                  |                                                                                                                         |                                                               | 16 Yes, 1 No, 0 N/A               |
| Robert et al. (2020)                                  | Yes                                                                                                                                     | Yes                                                                 | Yes                                                                                                                                         | Yes                                                                                                                                                                                                                          | Yes                                                                                                                                                   | Yes                                                                                                                                                  | Yes                                                                                                                                   | Yes                                                                                          | Yes                                                                                                                                                       | Yes                                                                                                                                    | Yes                                                                                                        | Yes                                            | Yes                                                                           | Yes                                                                 | Yes                                              | No                                                                                                                      | Yes                                                                         |                                                  |                                                                                                                         |                                                               | 16 Yes, 1 No, 0 N/A               |
| Thellier et al. (2017)                                | Yes                                                                                                                                     | Yes                                                                 | N/A                                                                                                                                         | Yes                                                                                                                                                                                                                          | No                                                                                                                                                    | Yes                                                                                                                                                  | Yes                                                                                                                                   | Yes                                                                                          | Can't tell                                                                                                                                                | Yes                                                                                                                                    | N/A                                                                                                        | No                                             | Yes                                                                           | Yes                                                                 | Yes                                              | No                                                                                                                      | Yes                                                                         |                                                  |                                                                                                                         |                                                               | 12 Yes, 2 No, 1 Can't tell, 2 N/A |
| van Beinum et al. (2016)                              | Yes                                                                                                                                     | Yes                                                                 | N/A                                                                                                                                         | Yes                                                                                                                                                                                                                          | No                                                                                                                                                    | Yes                                                                                                                                                  | N/A                                                                                                                                   | Yes                                                                                          | Can't tell                                                                                                                                                | Yes                                                                                                                                    | N/A                                                                                                        | Yes                                            | Yes                                                                           | Yes                                                                 | Yes                                              | No                                                                                                                      | Yes                                                                         |                                                  |                                                                                                                         |                                                               | 12 Yes, 1 No, 1 Can't tell, 3 N/A |
| White et al. (2009)                                   | Yes                                                                                                                                     | Yes                                                                 | N/A                                                                                                                                         | Yes                                                                                                                                                                                                                          | No                                                                                                                                                    | Yes                                                                                                                                                  | Yes                                                                                                                                   | Yes                                                                                          | Can't tell                                                                                                                                                | Yes                                                                                                                                    | N/A                                                                                                        | No                                             | Yes                                                                           | Yes                                                                 | Yes                                              | No                                                                                                                      | Yes                                                                         |                                                  |                                                                                                                         |                                                               | 12 Yes, 2 No, 1 Can't tell, 2 N/A |
| Quasi-Experimental JBI                                |                                                                                                                                         |                                                                     |                                                                                                                                             |                                                                                                                                                                                                                              |                                                                                                                                                       |                                                                                                                                                      |                                                                                                                                       |                                                                                              |                                                                                                                                                           |                                                                                                                                        |                                                                                                            |                                                |                                                                               |                                                                     |                                                  |                                                                                                                         |                                                                             |                                                  |                                                                                                                         |                                                               |                                   |
|                                                       | 1. Is it clear in the study what is the 'cause' and what is the 'effect' (i.e. there is no confusion about which variable comes first)? | 2. Were the participants included in any comparisons similar?       | 3. Were the participants included in any comparisons receiving similar treatment/care, other than the exposure or intervention of interest? | 4. Was there a control group?                                                                                                                                                                                                | 5. Were there multiple measurements of the outcome both pre and post the intervention/exposure?                                                       | 6. Was follow up complete and if not, were differences between groups in terms of their follow up adequately described and analyzed?                 | 7. Were the outcomes of participants included in any comparisons measured in the same way?                                            | 8. Were outcomes measured in a reliable way?                                                 | 9. Was appropriate statistical analysis used?                                                                                                             |                                                                                                                                        |                                                                                                            |                                                |                                                                               |                                                                     |                                                  |                                                                                                                         |                                                                             |                                                  |                                                                                                                         |                                                               |                                   |
| Campbell et al. (2015)                                | Yes                                                                                                                                     | Yes                                                                 | Yes                                                                                                                                         | Yes                                                                                                                                                                                                                          | Yes                                                                                                                                                   | N/A                                                                                                                                                  | Yes                                                                                                                                   | Unclear                                                                                      | Yes                                                                                                                                                       | 7 Yes, 1 Unclear, 1 N/A                                                                                                                |                                                                                                            |                                                |                                                                               |                                                                     |                                                  |                                                                                                                         |                                                                             |                                                  |                                                                                                                         |                                                               |                                   |
| Delphi Technique (based on CREDES)                    |                                                                                                                                         |                                                                     |                                                                                                                                             |                                                                                                                                                                                                                              |                                                                                                                                                       |                                                                                                                                                      |                                                                                                                                       |                                                                                              |                                                                                                                                                           |                                                                                                                                        |                                                                                                            |                                                |                                                                               |                                                                     |                                                  |                                                                                                                         |                                                                             |                                                  |                                                                                                                         |                                                               |                                   |
|                                                       | 1. Was there a clear statement of the aims of the research?                                                                             | 2. Is a Delphi methodology appropriate (authors provide rationale)? | 3. Are the criteria for panel selection transparent?                                                                                        | 4. Are response rates reported for each round?                                                                                                                                                                               | 5. Are all the preparations for each round of Delphi adequately described?                                                                            | 6. Is it comprehensible how consensus was achieved?                                                                                                  | 7. Are results reported for each round?                                                                                               | 8. Is the interpretation and processing of results insightful?                               | 9. Are the limitations of the study reported?                                                                                                             | 10. Are the conclusions adequately reflecting the outcomes of the Delphi?                                                              |                                                                                                            |                                                |                                                                               |                                                                     |                                                  |                                                                                                                         |                                                                             |                                                  |                                                                                                                         |                                                               |                                   |
| Downar et al. (2016)                                  | Yes                                                                                                                                     | Yes                                                                 | Yes                                                                                                                                         | Yes                                                                                                                                                                                                                          | Yes                                                                                                                                                   | Yes                                                                                                                                                  | Yes                                                                                                                                   | Yes                                                                                          | Yes                                                                                                                                                       | Yes                                                                                                                                    | 10 Yes                                                                                                     |                                                |                                                                               |                                                                     |                                                  |                                                                                                                         |                                                                             |                                                  |                                                                                                                         |                                                               |                                   |
